# Supplementary material
Source: publisher figshare collection journal article supplement (https://acs.figshare.com/ndownloader/files/4684402)
Supplement: Supplementary file 1 [file 4684402]

Supporting Information:

## **Photo-isomerization of Spiropyran for driving a Molecular Shuttle**

Weidong Zhou, Dugang Chen, Junbo Li, Jialiang Xu, Jing Lv, Huibiao Liu, Yuliang Li\*

*National Laboratory for Molecular Sciences, Key Laboratory of Organic Solids ,  
Institute of Chemistry, Chinese Academy of Sciences, Beijing, 100080, P. R. China  
ylli@iccas.ac.cn*

### **Table of contents:**

**§1. Materials.**

**§2. Measurements.**

**§3. Synthesis Route**

**§4. Synthesis and characterization data of all compounds**

**§5. Kinetic Studies**

**§6. Reference.**

## **§1. Materials.**

Unless stated otherwise, all reagents and anhydrous solvents were purchased for Aldrich Chemicals and used without further purification.

## **§2. Measurements**

Column chromatography (CC): SiO<sub>2</sub> (200–300 meshes). TLC glass plates coated with SiO<sub>2</sub> F254 were visualized by UV light. <sup>1</sup>H and <sup>13</sup>C NMR spectra were recorded on a Bruker AV 400 or 600 instruments, at a constant temperature of 25°C. Chemical shifts are reported in parts per million from low to high field and referenced to TMS. MALDI-TOF mass spectrometric measurements were performed on Bruker Biflex III MALDI-TOF. UV/ vis spectra were measured on a Hitachi U-3010 spectrometer. Fluorescence excitation and emission spectra were recorded using a Hitachi F-4500 FL fluorimeter at a constant temperature of 25°C.

### §3. Synthesis Route

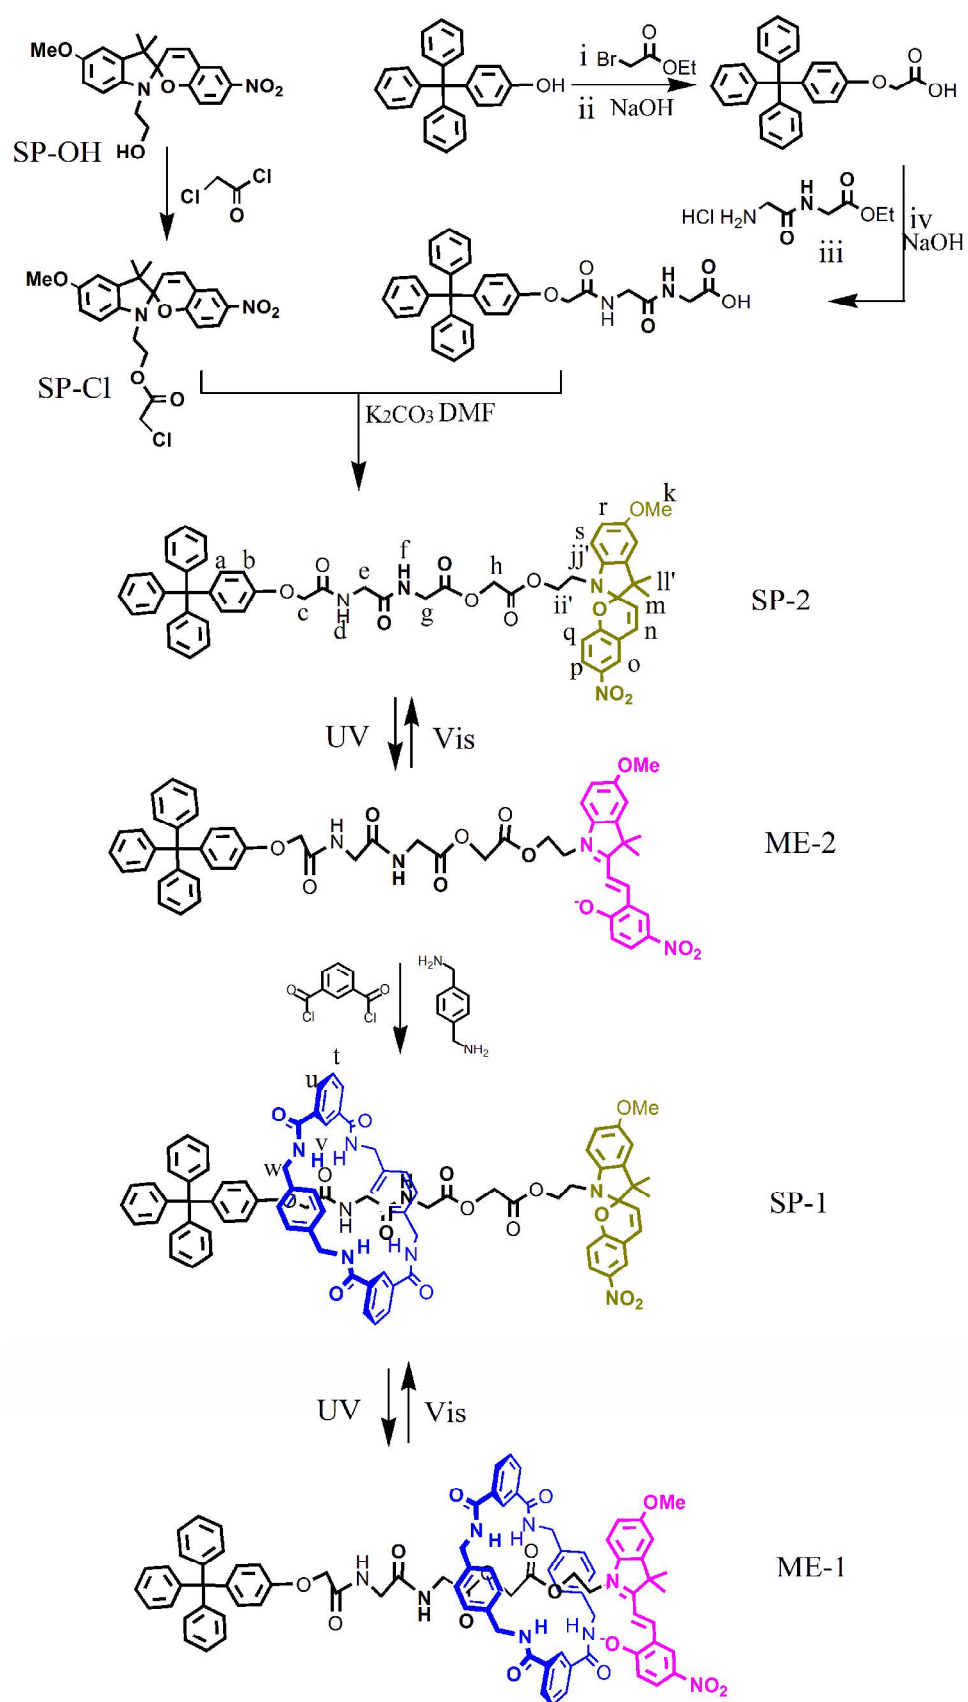

## §4. Synthesis and characterization data of all compounds

**SPN-OH** A solution of 6-methoxy-3a,4,4-trimethyloxazolidino[3,2-a]indoline (932mg, 4 mmol) and 2-hydroxy-5-nitrobenzaldehyde (735mg, 4.4 mmol) in alcohol (15mL) was heated for 3h under reflux and nitrogen. After cooling down to room temperature, the mixture was filtered. The residual purple solid was washed with EtOH (10×3) and dried to afford **ME** (1.2g, 81%). <sup>1</sup>H NMR(CDCl<sub>3</sub>) δ 8.007(m, 2H), 6.898(d, 1H, *J*=10.344 Hz), 6.756(m, 3H), 6.577(d, 1H, *J*=8.08Hz), 5.872(d, 1H, *J*=10.35 Hz), 3.79(s, 3H), 3.84-3.69 (m, 2H), 3.40(m, 1H), 3.28(m, 1H), 1.27(s, 3H), 1.239(s, 3H). <sup>13</sup>C NMR(CDCl<sub>3</sub>) δ 158.39, 153.31, 140.08, 136.48, 130.92, 127.18, 124.90, 121.718, 120.88, 117.54, 114.466, 110.455, 108.778, 106.24, 106.03, 66.91, 59.85, 54.93, 52.39, 51.91, 45.475, 24.768, 24.566, 18.914. MS (EI): 381(M<sup>+</sup>)

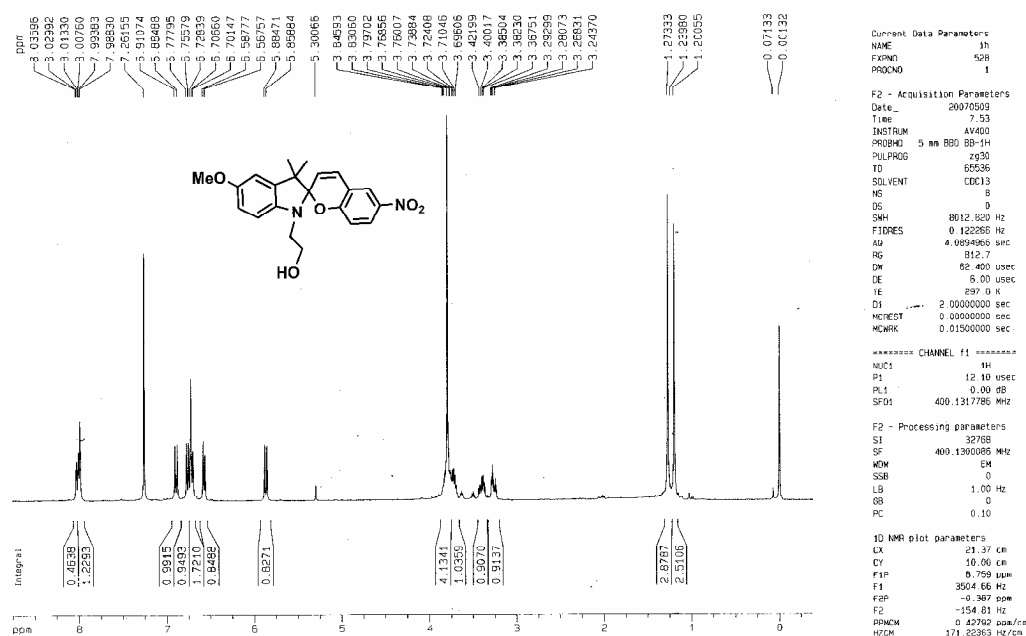

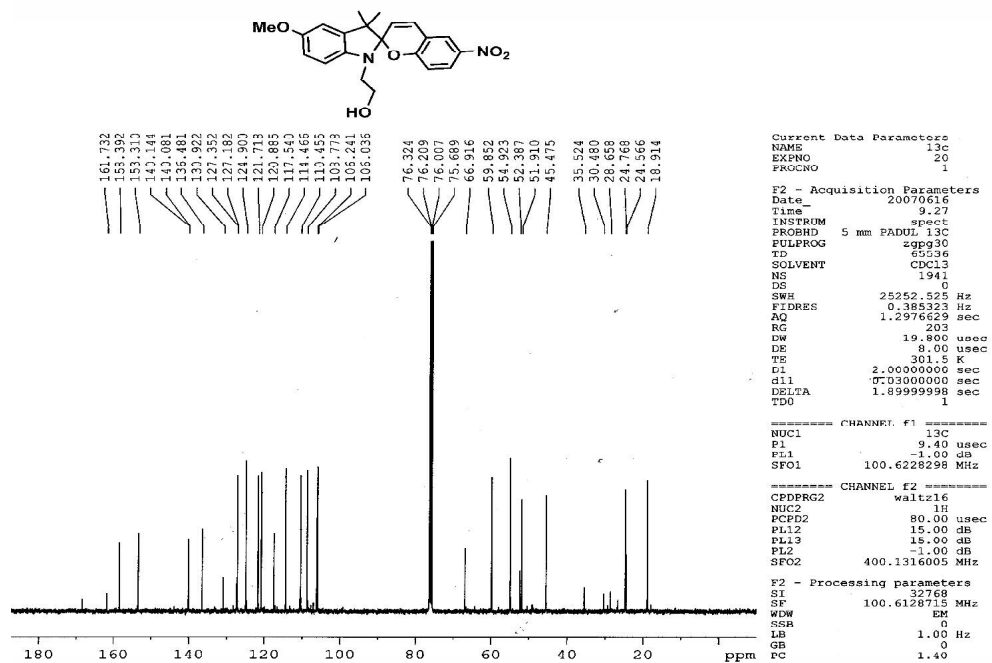

## SPN-Cl

2-chloroacetyl chloride (0.67g, 6mmol) was added to a solution of SPN-OH (1g, 2.6mmol) and Et<sub>3</sub>N (1mL) in CHCl<sub>3</sub> at 0°C. Then the mixture was stirred at room temperature for 8h and washed with distilled water (3×50mL). The collected organic layers were dried over NaSO<sub>4</sub>, and the chloroform was removed in vacuum to gain the product **SPN-Cl** (0.892g, 75%) after the purification by flash chromatograph (CH<sub>2</sub>Cl<sub>2</sub>: hexane, 1/1, v/v). <sup>1</sup>H NMR(CDCl<sub>3</sub>) δ 8.03 (m, 2H), 6.93(d, 1H, *J*=12Hz), 6.74(m, 3H), 6.59(d, 1H, *J*=8Hz), 5.92(d, 1H, *J*=8Hz), 4.3(m, 2H), 4.05(s, 2H), 3.80(s, 3H), 3.5 (m, 1H), 3.4 (m, 1H), 1.2 (s, 3H), 1.1 (s, 3H). <sup>13</sup>C NMR(CDCl<sub>3</sub>) δ 166.14, 158.38, 153.38, 140.09, 139.62, 136.37, 127.35, 124.93, 121.76, 120.73, 117.45, 114.50, 110.49, 108.81, 106.003, 105.736, 63.147, 54.91, 51.97, 41.55, 39.66, 24.73, 18.75. MS (EI): 458.1.

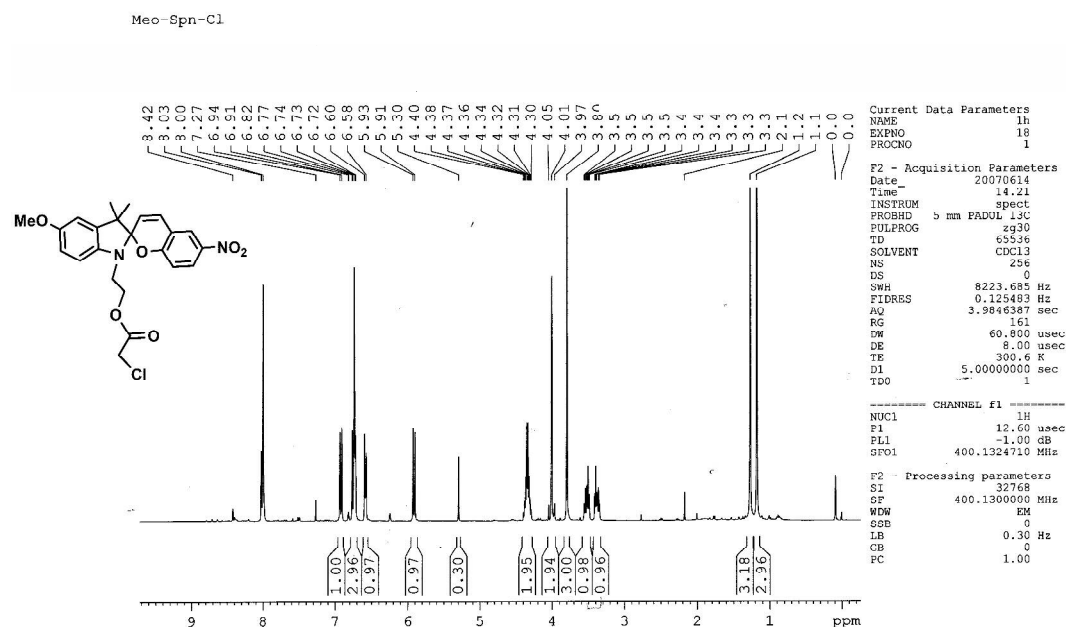

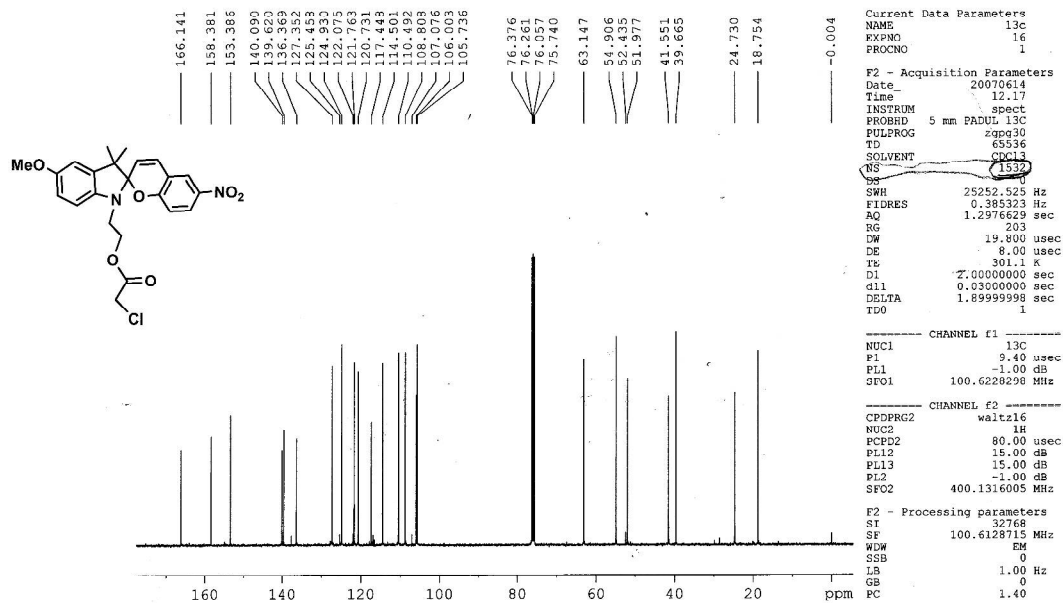

## 2-(4-tritylphenoxy)acetic acid (2)

A mixture of 4-tritylphenol (3.36g, 10mmol) and ethyl 2-bromoacetate (1.67g, 10mmol) were dissolved in 250 mL dry acetone and refluxed for 6 hours in the presence of  $K_2CO_3$  (4.14 g, 30mmol) under nitrogen. The mixture was filtered and the solvent was evaporated. The crude product was dissolved in  $CH_2Cl_2$  and washed three times with distilled water. The organic solvent was then evaporated off to give a pale solid, which was used directly in the following step without further purification. To the ethanol solution of this pale solid, 10ml 50% NaOH aqueous solution was added at room temperature. The mixture was stirred for 10 hours followed by the addition of excess hydrochloric acid. Much white appreciate formed with the addition of hydrochloric acid, then it was filtered and washed with distilled water and  $CH_2Cl_2$  for several times to give the white solid (2.1g, 53%). MS (EI): 393( $M^+$ ).  $^1H$  NMR(DMSO- $D_6$ )  $\delta$ 7.258 (m, 6H), 7.18-7.09(9H), 7.005(d, 2H,  $J=9$ Hz), 6.801(d, 2H,  $J=9$ Hz), 4.59(s, 2H).  $^{13}C$  NMR(DMSO- $D_6$ )  $\delta$ 170.13, 155.699, 146.575, 138.768, 131.491, 130.41, 127.609, 125.773, 113.486, 64.548, 63.766.

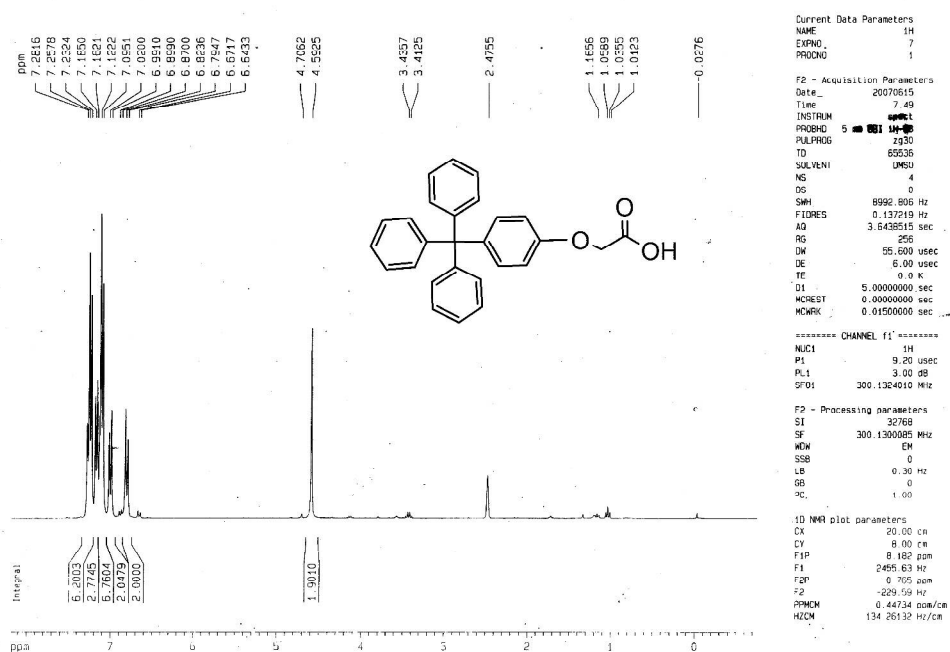



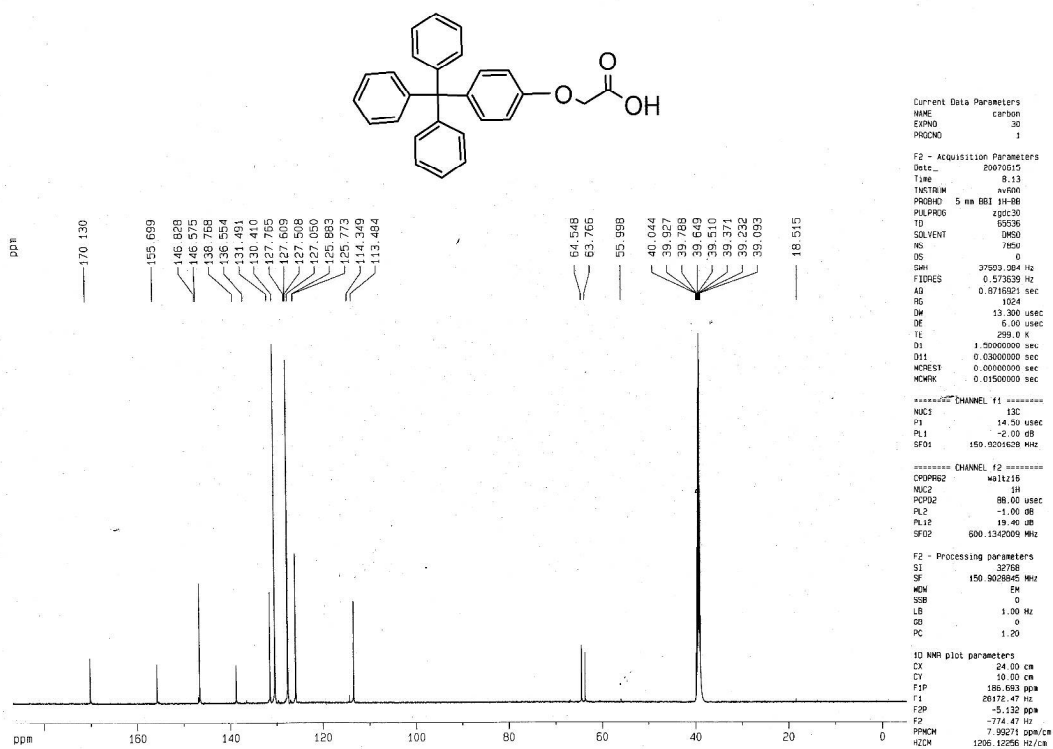

### ethyl 2-(2-(2-(4-tritylphenoxy)acetamido)acetamido)acetate (3)

To a stirred solution of compound **2** (1.56 g, 4 mmol), ethyl 2-(2-aminoacetamido)acetate hydrochloride (784mg, 4 mmol) and DMAP (576mg, 4.5 mmol) in anhydrous  $\text{CH}_2\text{Cl}_2$  (200 mL) cooled on an ice bath was added EDCI·HCl (955mg, 5 mmol). After 12 h the solution was washed with a saturated solution of citric acid (3x80 mL) and  $\text{H}_2\text{O}$  (3x50 mL) and the organic layer dried over anhydrous  $\text{Na}_2\text{SO}_4$ , filtered and the filtrate reduced in volume to obtain a white solid. Purification was accomplished by column chromatography on silica with  $\text{CH}_2\text{Cl}_2/\text{CH}_3\text{OH}$  (50/1, v/v) to give **3** (1.71 g, 80%).  $^1\text{H}$  NMR ( $\text{CDCl}_3$ ):  $\delta$  7.37 (broad, 1H), 7.23-7.12 (m, 17H), 6.789 (d, 2H,  $J=8.9\text{Hz}$ ), 4.51 (s, 2H), 4.18(q, 2H,  $J=7.14\text{Hz}$ ), 4.08 (d, 2H,  $J=5.58\text{Hz}$ ), 4.02(d, 2H,  $J=5.31\text{Hz}$ ), 1.25(t, 3H,  $J=7.16\text{Hz}$ ).  $^{13}\text{C}$  NMR ( $\text{CDCl}_3$ ):  $\delta$  168.54, 168.02, 167.6, 154.1, 145.76, 139.7, 131.47, 131.04, 126.468, 124.94, 112.56, 66.19, 63.32, 60.61, 41.54, 40.32, 13.09. MS (EI): 536.

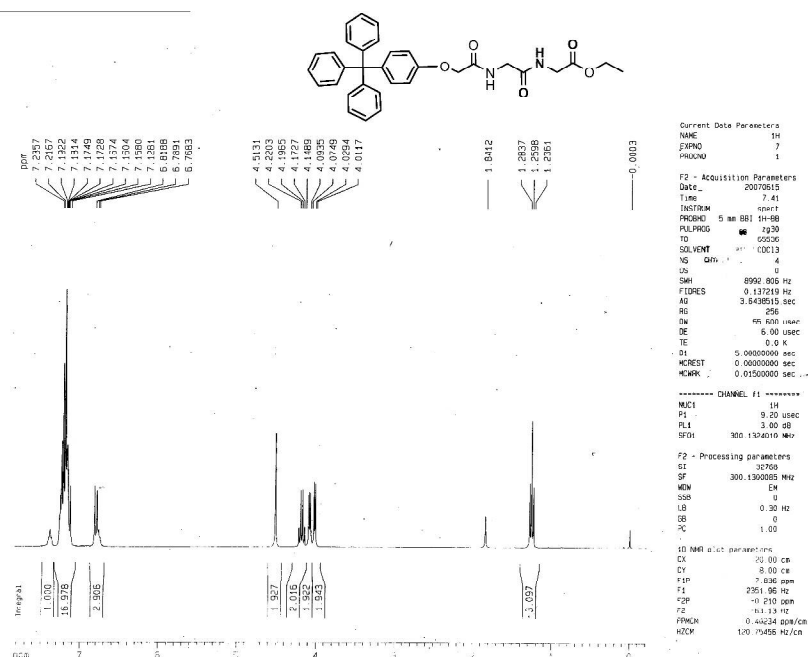

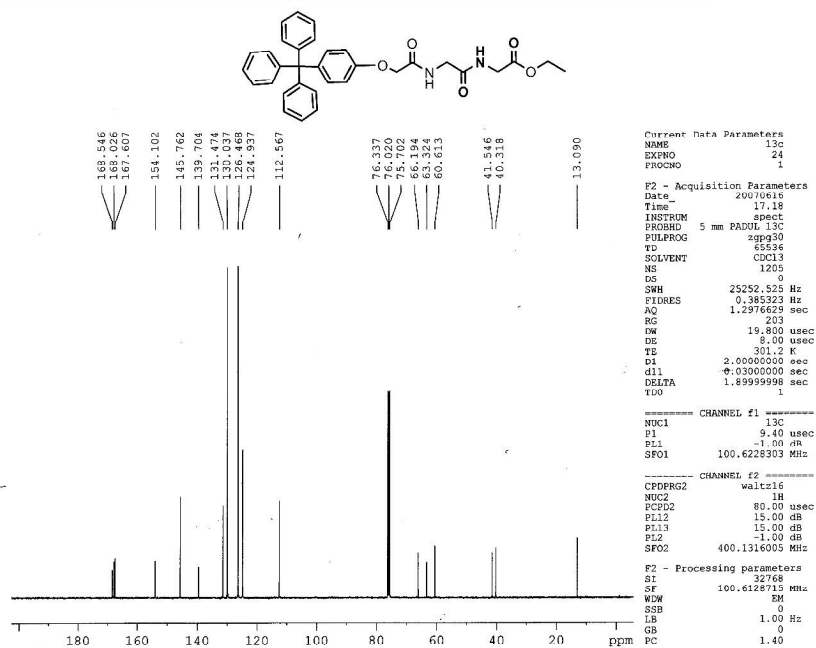

## 2-(2-(2-(4-tritylphenoxy)acetamido)acetamido)acetic acid (4)

In a 50-mL flask, compound **3** (1.07g, 2mmol) was dissolved in 100 mL of EtOH/THF (1:1, v:v). NaOH aqueous solution (5mL, 2mol/L) was carefully added under stirring. The reaction mixture was stirred for 12 h at room temperature. Then, the solvent was removed under reduced pressure, and the residue was redissolved in distilled water. HCl aqueous solution (10mL, 2mol/L) was carefully added under stirring. The reaction mixture was filtered and washed with distilled water for several times. 975 mg (96%) product was obtained as a white solid after dehydration. <sup>1</sup>HNMR (DMSO-D<sub>6</sub>): δ 8.32(t, 1H, *J*=5.9Hz), 8.22(t, 1H, *J*=5.9Hz), 7.31-7.28(m, 6H), 7.26-7.13(m 9H), 7.06(d, 2H, *J*=8.9Hz), 6.93(d, 2H, *J*=8.9Hz), 4.52(s, 2H), 3.83(d, 2H, *J*=5.9Hz), 3.78(d, 2H, *J*=5.9Hz). <sup>13</sup>C NMR (DMSO-D<sub>6</sub>): δ 171.706, 169.564, 168.599, 156.19, 147.17, 139.69, 132.18, 131.03, 128.25, 126.53, 114.41, 67.414, 64.399, 42.129, 41.18. MS (EI): 507(M<sup>+</sup>).

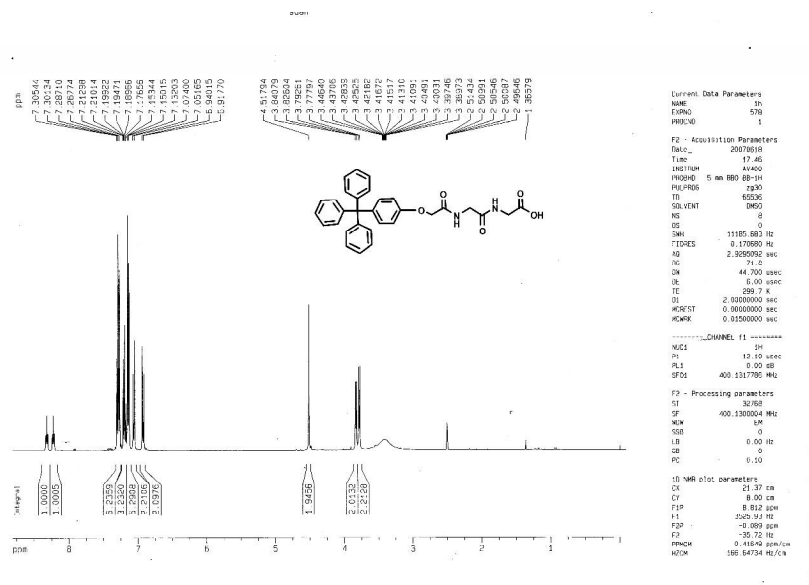

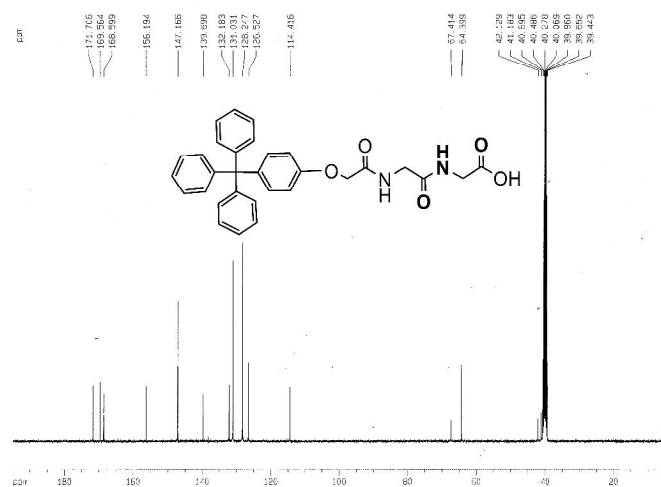

Experiments Data Parameters

NAME: 13C  
EXPNO: 16  
PROCNO: 1

F2 Acquisition Parameters

DATE\_: 20070303  
TIME: 10.43  
INSTRUM: spect  
PROBHD: 5 mm HET 90-1  
PULPROG: zgpg30  
TD: 65536  
CONVET: 1  
RG: 327.5  
DS: 4  
SWH: 19999.814 Hz  
FIDRES: 0.355218 Hz  
AQ: 1.3654775 sec  
RG: 3839.4  
SW: 23.823 kHz  
DE: 6.00 uV  
TE: 300.2 K  
H1: 0.0000000 sec  
C13: 0.3300000 sec  
WDECT: 0.3300000 sec  
WDEPR: 0.3300000 sec

===== CHANNEL f1 =====

NUC1: 13C  
P1: 14.00 uV  
PL1: -1.00 dB  
SFO1: 100.6260600 MHz

===== CHANNEL f2 =====

CPDPRG2: waltz16  
NUC2: 1H  
PCPD2: 80.00 uV  
PL2: 0.00 dB  
PL3: 18.50 dB  
SFO2: 400.1310000 MHz

F3 Processing parameters

SI: 32768  
SF: 100.6127579 MHz  
WDW: EM  
SSB: 0  
LB: 1.00 Hz  
GB: 0  
PC: 1.40

1D NMR file parameters

IN: 75.00 cm  
CY: 20.00 cm  
FIDP: 194.509 sec  
F1: 16611.41 Hz  
F2: 5.839 sec  
F3: 360.31 Hz  
PRMCH: 8.33897 cm/sec  
VCMCH: 825.70597 Hz/cm

## SP-2

To a stirred solution of **4** (508 mg, 1mmol) in DMF was added **SP-Cl** (458mg, 1mmol) and  $K_2CO_3$  (414mg, 3mmol) under nitrogen flux. The mixture was heated to 80°C and stirred for 8 hours. Then the solvent was distilled under reduced pressure, and the residue was washed with water and dried with  $Na_2SO_4$ . Purification was accomplished by column chromatography on silica with  $CH_2Cl_2/MeOH$  (50/1, v/v) to give **SP-2** 600mg(65%).  $^1H$  NMR ( $CD_3CN-D_3$ ):  $\delta$  8.07(d, 1H,  $J=2.94Hz$ ), 7.98(dxd, 1H,  $J=8.82Hz$ ,  $J=3.2Hz$ ), 7.49(t, 1H,  $J=5.5Hz$ ), 7.28-7.22(m, 13H), 7.20-7.16(m, 5H), 7.03(d, 1H,  $J=10.2Hz$ ), 6.98(t, 1H,  $J=5.4Hz$ ), 6.88(d, 2H,  $J=9Hz$ ), 6.77(d, 1H,  $J=2.4Hz$ ), 6.72(dxd, 1H,  $J=8.4Hz$ ,  $J=3.2 Hz$ ), 6.69(d, 1H,  $J=9Hz$ ), 6.59(d, 1H,  $J=8.4Hz$ ), 5.95(d, 1H,  $J=10.2Hz$ ), 4.57(q, 2H,  $J=10.2Hz$ ), 4.48(s, 2H), 4.35-4.30(m, 1H), 4.22-4.17(m, 1H), 3.97(d, 2H,  $J=6.6Hz$ ), 3.89 (d, 2H,  $J=6.0Hz$ ), 3.73 (s, 3H), 3.48-3.42(m, 1H), 3.33-3.27(m, 1H), 1.22(s, 3H), 1.12(s, 3H).  $^{13}C$  NMR ( $CD_3Cl$ )  $\delta$  168.994, 167.196, 162.585, 159.383, 155.189, 154.358, 146.799, 141.039, 140.527, 137.382, 132.379, 130.99, 128.46, 127.48, 126.05, 122.83, 121.58, 118.50, 115.47, 109.75, 106.99, 106.74, 113.59, 111.53, 67.184, 64.311, 63.477, 60.99, 55.888, 53.57, 52.94, 42.559, 42.336, 40.9, 36.438, 31.366, 25.717, 19.725. MS (MALDI-TOF): 930, 953(**SP-2** +Na).

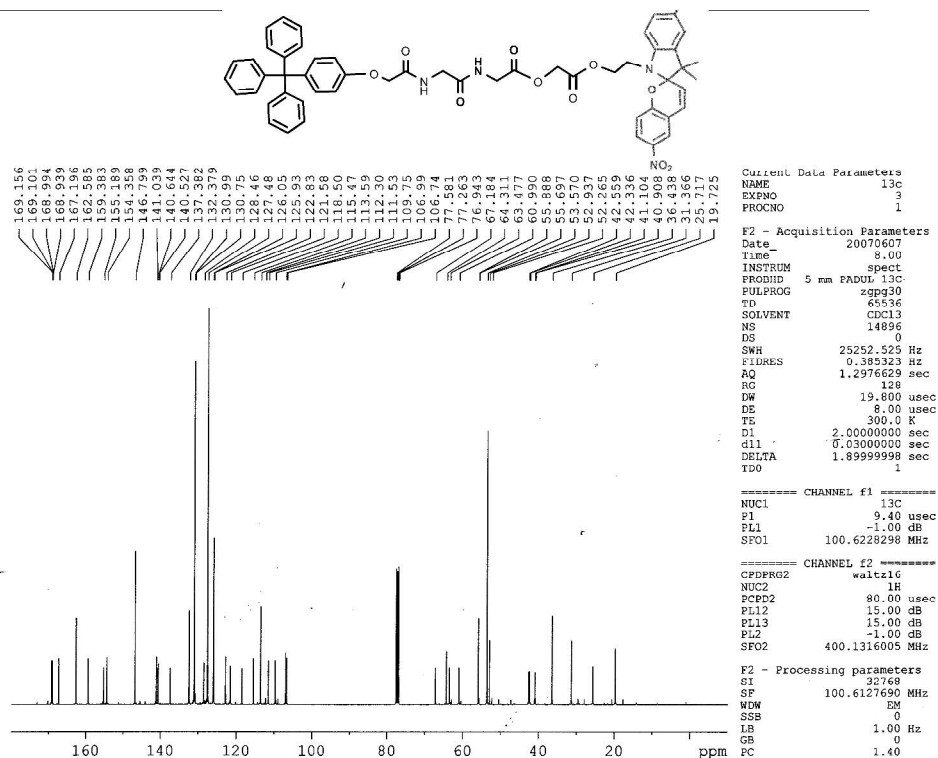

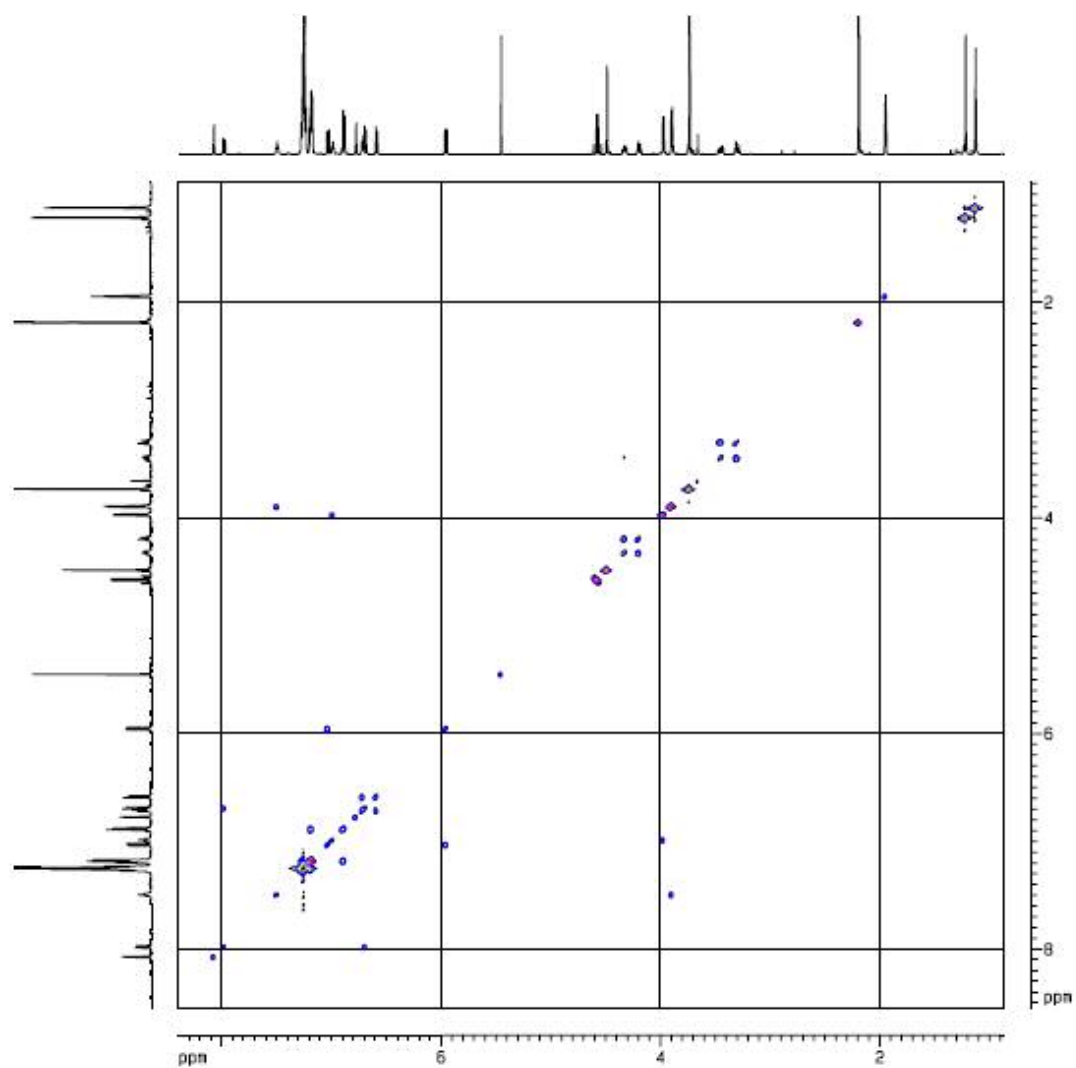

### SP-1

To a solution of 0.186 g (0.2mmol) of **SP-2** in 200 mL of CH<sub>2</sub>Cl<sub>2</sub> and Et<sub>3</sub>N (exc.) were added simultaneously solutions of 0.404 g (2 mmol) of 3,5-pyridinedicarbonyl dichloride in 60 mL of CH<sub>2</sub>Cl<sub>2</sub> and 0.272 g (2 mmol) of p-xylylenediamine in 60 mL of CH<sub>2</sub>Cl<sub>3</sub> over a period of 2 hrs. The mixture was stirred for 4 hours and then filtrated. The filtrate was concentrated and purified by flash chromatography (silica gel, 5% MeOH in CH<sub>2</sub>Cl<sub>2</sub>) to obtain 58 mg (20 %) of the title compound as a grey solid.

<sup>1</sup>HNMR (CD<sub>3</sub>CN-D<sub>3</sub>): δ 8.385 (s, 2H), 8.028-7.988(m, 5H), 7.953(d×d, 1H, *J*=9Hz, *J*=3Hz), 7.659(m, 4H), 7.518(t, 2H, *J*=7.8), 7.499(t, 1H, *J*=5.4), 7.264(m, 7H), 7.179(m, 10H), 7.143(s, 8H), 6.970(d, 1H, *J*=11.4Hz), 6.938(d, 3H, *J*=9.6Hz), 6.747(d, 1H, *J*=2.4Hz), 6.674(d, 2H, *J*=9Hz), 6.501(d, 1H, *J*=8.4Hz), 6.413(d, 2H, *J*=9.6Hz), 5.875(d, 1H, *J*=11.2Hz), 4.42-4.37(m, 9H), 4.19(m, 1H), 4.09(m, 1H), 4.07(s, 2H), 3.807(d, 2H, *J*=5.4Hz), 3.72(s, 3H), 3.389-3.31(m, 1H), 3.235-3.108(m, 1H), 2.817(d, 2H, *J*=4.8Hz), 1.188(3, 3H), 1.08(s, 3H). <sup>13</sup>CNMR (CD<sub>3</sub>CN) 169.625, 168.923, 169.23, 166.94, 166.64, 159.37, 154.36, 154.14, 146.63, 141.32, 140.98, 140.57, 137.46, 133.91, 131.457, 130.96, 129.036, 127.56, 125.98, 118.37, 106.911, 64.27, 53.45, 52.96, 44.095. MS (MALDI-TOF): 1463.6.



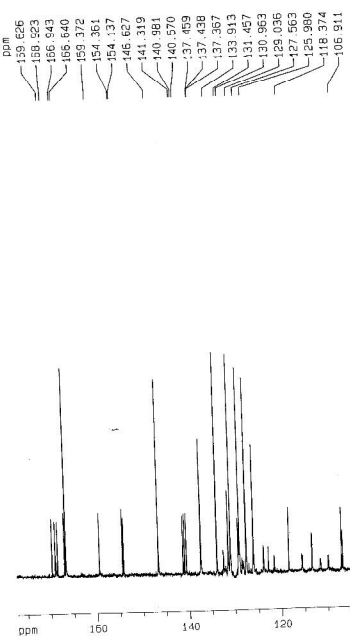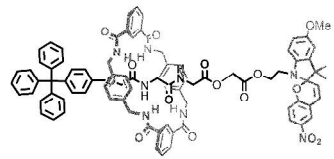

Current Data Parameters  
 NAME: London  
 EXPNO: 14  
 PROCNO: 1

F2 - Acquisition Parameters  
 Date\_: 20070531  
 Time: 17.23  
 INSTRUM: av600  
 PROBHD: 5 mm BBI 1H-60  
 PULPROG: zgpg30  
 TO: 65536  
 SOLVENT: DMS-D6  
 NS: 18107  
 DS: 0  
 SWH: 37593.984 Hz  
 FIDRES: 0.573629 Hz  
 AQ: 0.8716821 sec  
 RG: 812.7  
 RW: 13.360 usec  
 DC: 6.50 usec  
 TE: 297.2 K  
 D1: 2.00000000 sec  
 D11: 0.03000000 sec  
 MDPRST: 0.00000000 sec  
 MONK: 0.01500000 sec

===== CHANNEL f1 =====  
 NUC1: 13C  
 P1: 14.50 usec  
 PL1: -2.00 dB  
 SFO1: 150.9178963 MHz

===== CHANNEL f2 =====  
 CPDPRG2: waltz16  
 NUC2: 1H  
 P2: 88.00 usec  
 PL2: -1.00 dB  
 PL12: 19.40 dB  
 SFO2: 600.1324005 MHz

F2 - Processing parameters  
 SI: 32768  
 SF: 150.9028090 MHz  
 MCH: CH  
 SSB: 0  
 LB: 2.00 Hz  
 GB: 0  
 PC: 1.40

1D NMR plot parameters  
 CX: 23.00 cm  
 CY: 50.00 cm  
 F1P: 177.562 ppm  
 F1: 26762.04 Hz  
 F2P: -6.293 ppm  
 F2: -1251.43 Hz  
 PPMCH: 0.07152 ppm/cm  
 HZCH: 1219.01575 Hz/cm

D:\Data\_IC\200707-05070531\050531180\_C14V1  
 printed: 5/31/2007 4:37:04 PM

# MALDI-TOF,CCA,ZWD-1,2007,05,31

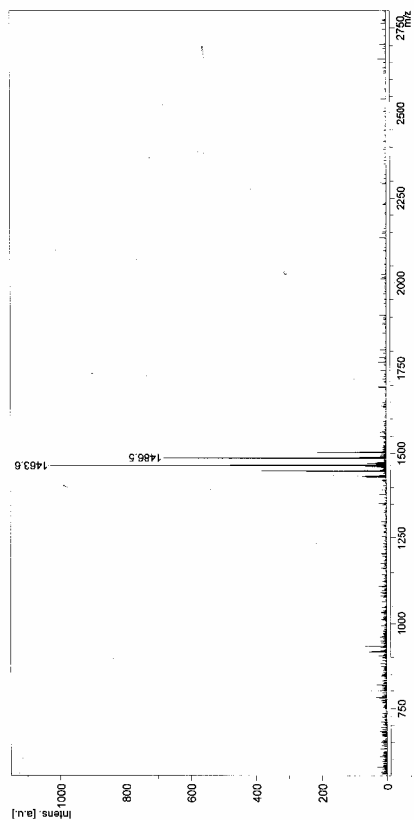

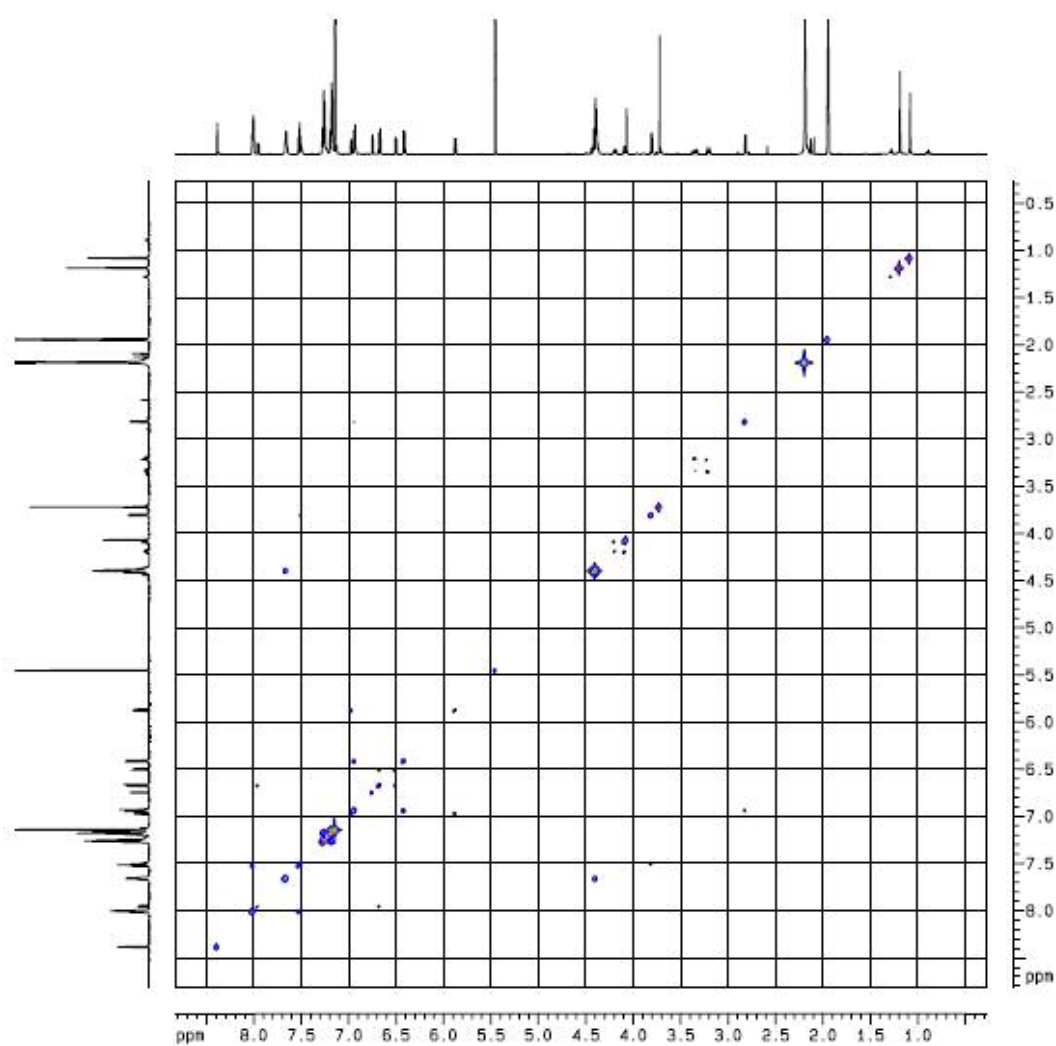

## ME-1

**ME-1** was gained from the irradiation of **SP-1** with 365nm UV light for 3min at room temperature. The opened structure **ME-1** is just about 26% of the total isomers according to the analysis of this  $^1\text{H}$  NMR spectrum.

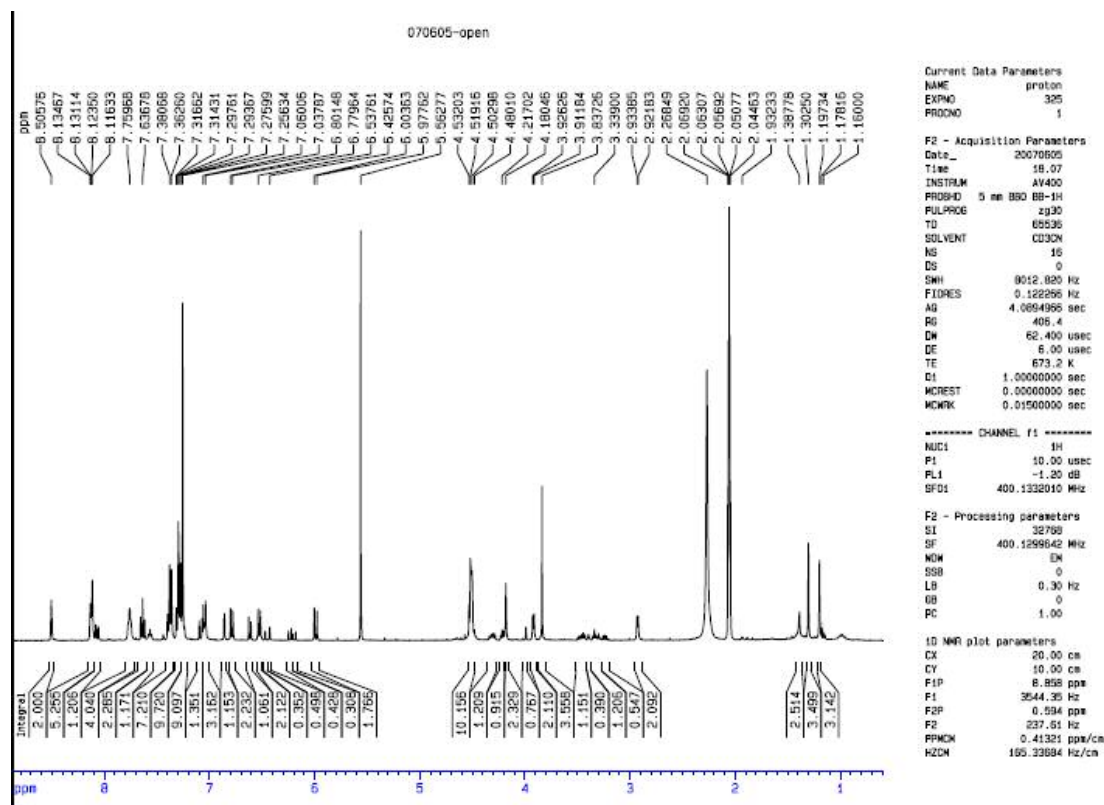

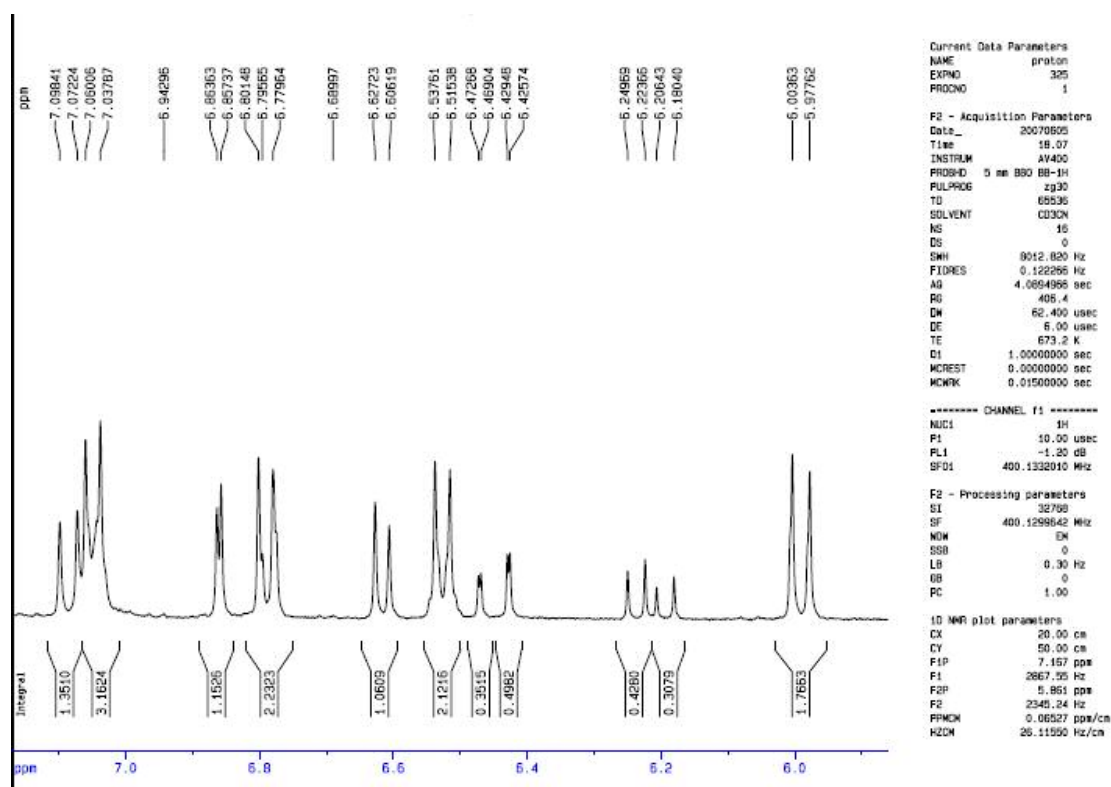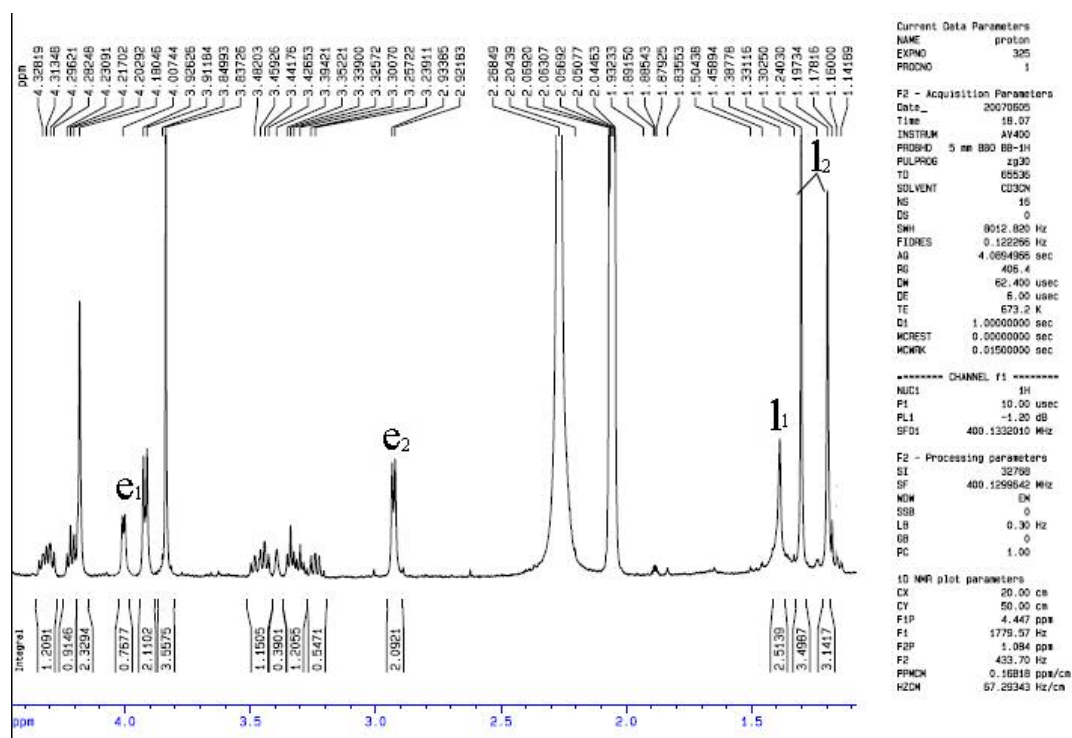

The signals of  $e_1$  and  $l_1$  come from the opened form **ME-1**, while the  $e_2$  and  $l_2$  come from the closed form **SP-1**.  $e_1/e_2=0.36$ ,  $l_1/l_2=0.37$ .

## §5. Kinetic Studies

In the dark, the rate of switching from ME to SP is given by equation (1).<sup>[1]</sup> [ME1] and [ME2] are concentrations of **ME1** and **ME2**, respectively.  $k_1$  and  $k_2$  are rate constants for two isomerization reactions.  $t_1$  and  $t_2$  are reaction times. [ME] is related to the absorption (A), measured at a certain wavelength. The ratio of  $k_1/k_2$  was calculated from the equation (2) which is deduced from equation (1).

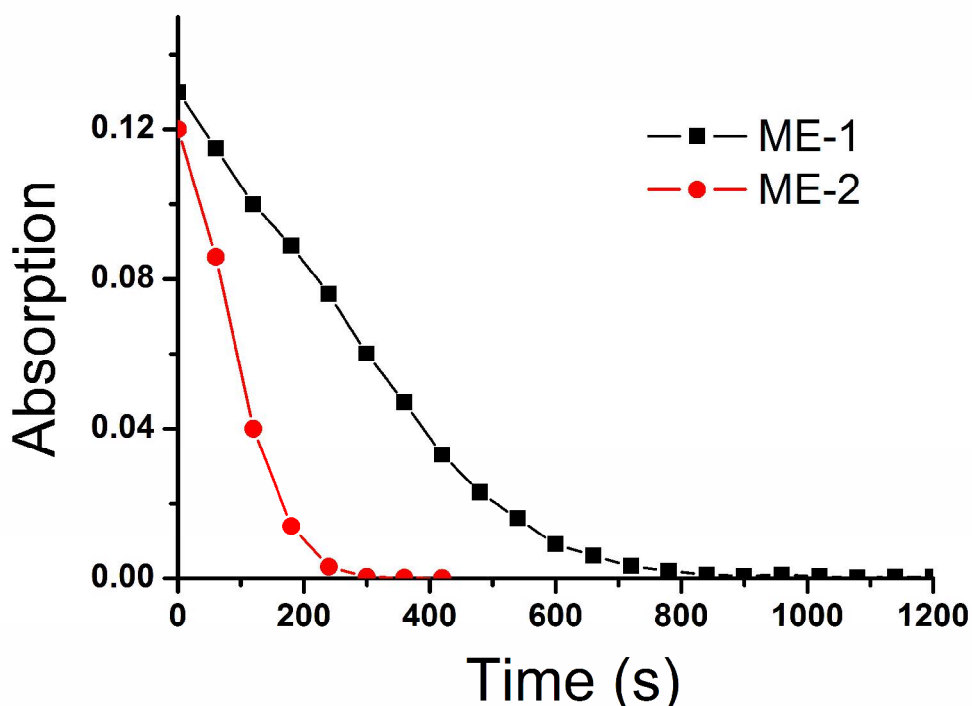

The plot of the absorption spectra from **ME-1** and **ME-2** at 569nm against time in the dark. ( $5 \times 10^{-5}$  M, CH<sub>3</sub>CN, 25 °C)

$$\ln[\text{ME}] = -kt + \ln[\text{ME}_0] \quad (1)$$

$$-kt = \ln[\text{ME}] - \ln[\text{ME}_0]$$

$$k_1/k_2 = (\ln[\text{ME1}] - \ln[\text{ME1}_0]) / (\ln[\text{ME2}] - \ln[\text{ME2}_0]) \times (t_2/t_1) \quad (2)$$

$$k_1/k_2 = 0.167$$

## §6. Reference.

(1) F. M. Raymo, S. Giordani *J. Am. Chem. Soc.* **2001**, *123*, 4651-4652.  
mol L<sup>-1</sup>
